# Supplementary material
Source: Springer Nature journal article supplement (https://www.springermedizin.de/resource/supplementary/12885_2009_2325_MOESM2_ESM.pdf/9461026)

**A**

OPM-2

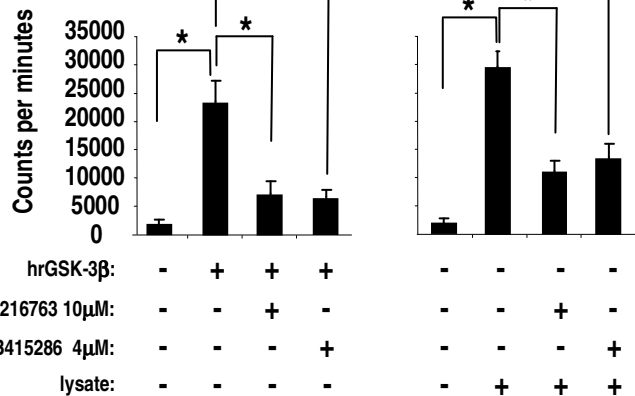**B**

RPMI-8226

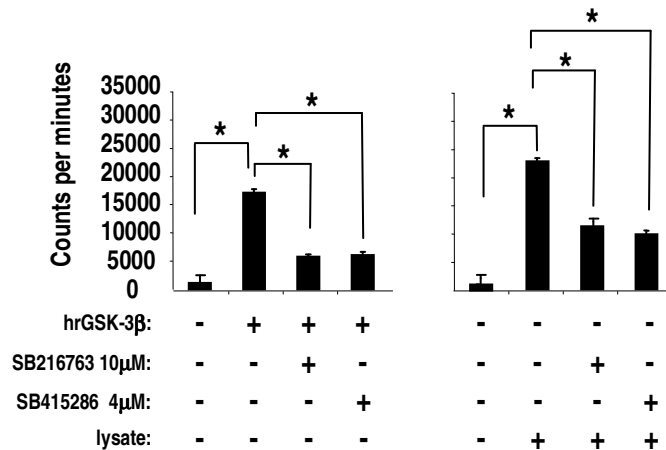**C**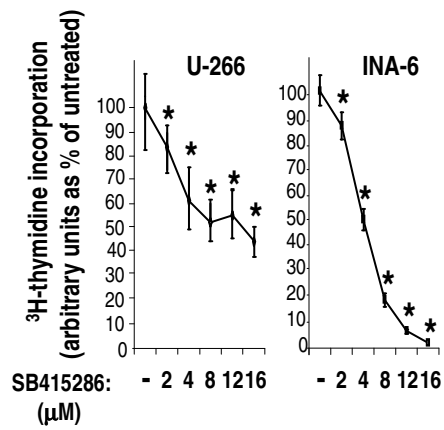

Supplement: MOESM2 [file 9461026]
